# Supplementary material
Source: Springer Nature journal article supplement (https://www.springermedizin.de/resource/supplementary/12933_2012_528_MOESM1_ESM.pdf/9538402)

# Kaplan-Meier Survival Curves

Any Myocardial Event & LDL Goal Attainment

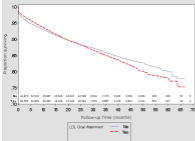

Supplement: MOESM1 [file 9538402]
